# Supplementary material for: Self-induced cobalt-derived hollow structure Prussian blue as a cathode for sodium-ion batteries
Source: Royal Society of Chemistry journal article supplement (doi:10.1039/d1ra05612c), 2021-01-01
Supplement: d1ra05612c1.pdf [file d1ra05612c1.pdf]

## Self-induce cobalt derive hollow structure Prussian blue as cathode for sodium-ion battery

Yu Luo, Jiayu Peng, Youwei Yan \*

State Key Laboratory of Material Processing and Die & Mould Technology, School of  
Materials Science and Engineering, Huazhong University of Science and Technology,  
Wuhan, Hubei 430074, China.

\* Corresponding Authors.

E-mail address: [yanyw@hust.edu.cn](mailto:yanyw@hust.edu.cn)

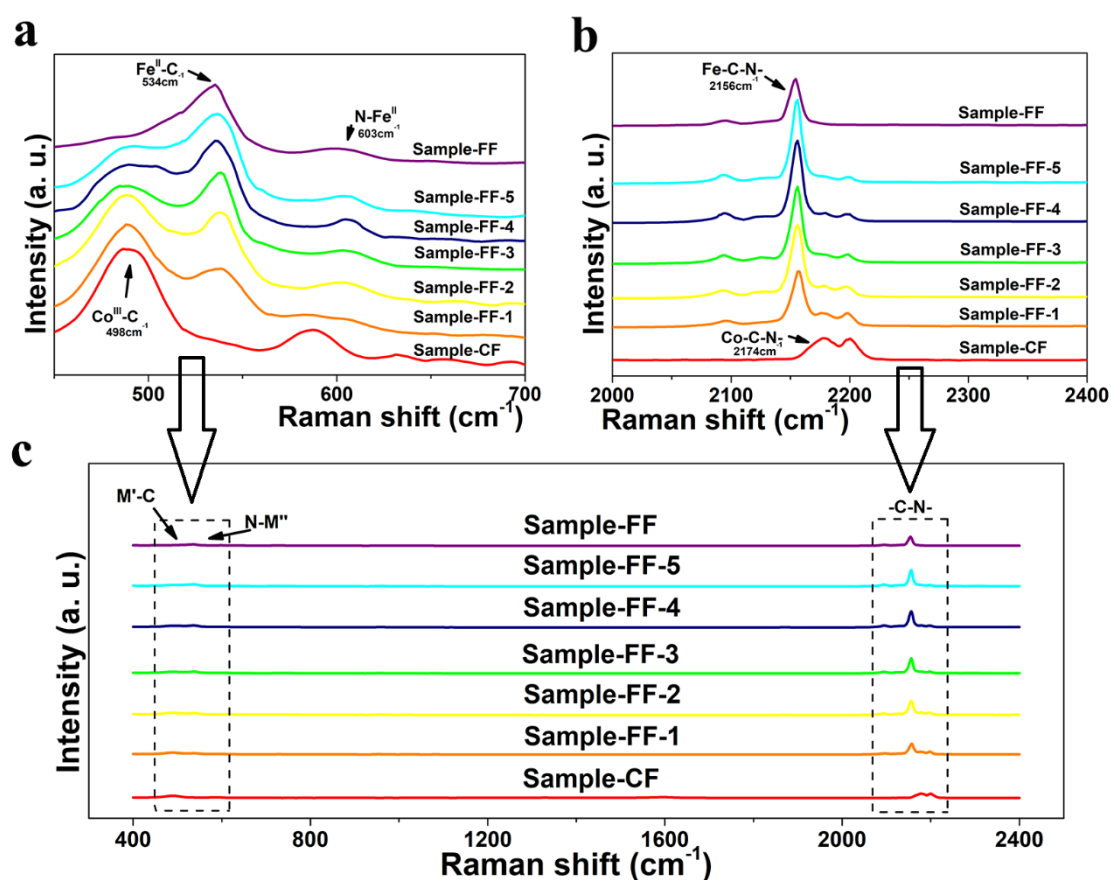

**Figure S1.** Ex situ Raman plots of the samples in different vibration interval ranges: (a) 400-700 cm<sup>-1</sup>. (b) 2000-2400 cm<sup>-1</sup>. (c) 400-2400 cm<sup>-1</sup>.

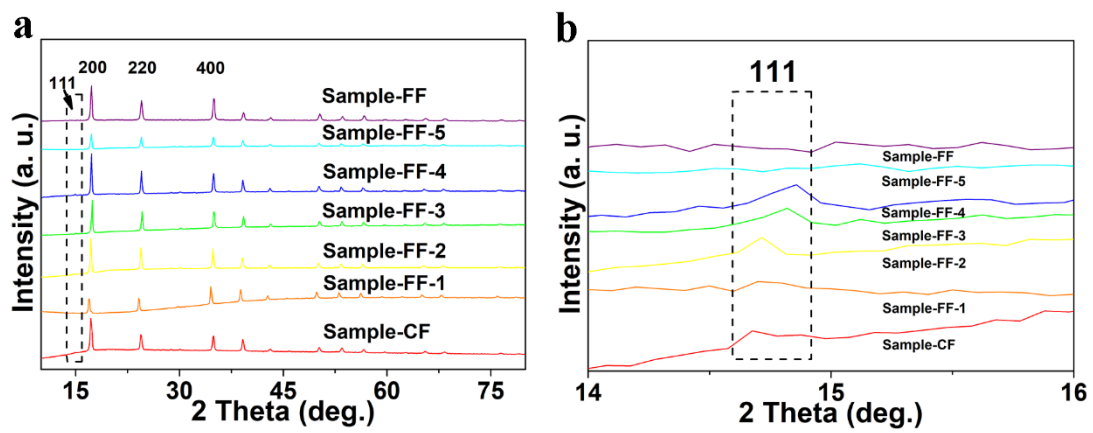

**Figure S2.** Ex XRD patterns of the samples in different interval ranges: (a) 10-80 degree. (b) 14-16 degree.

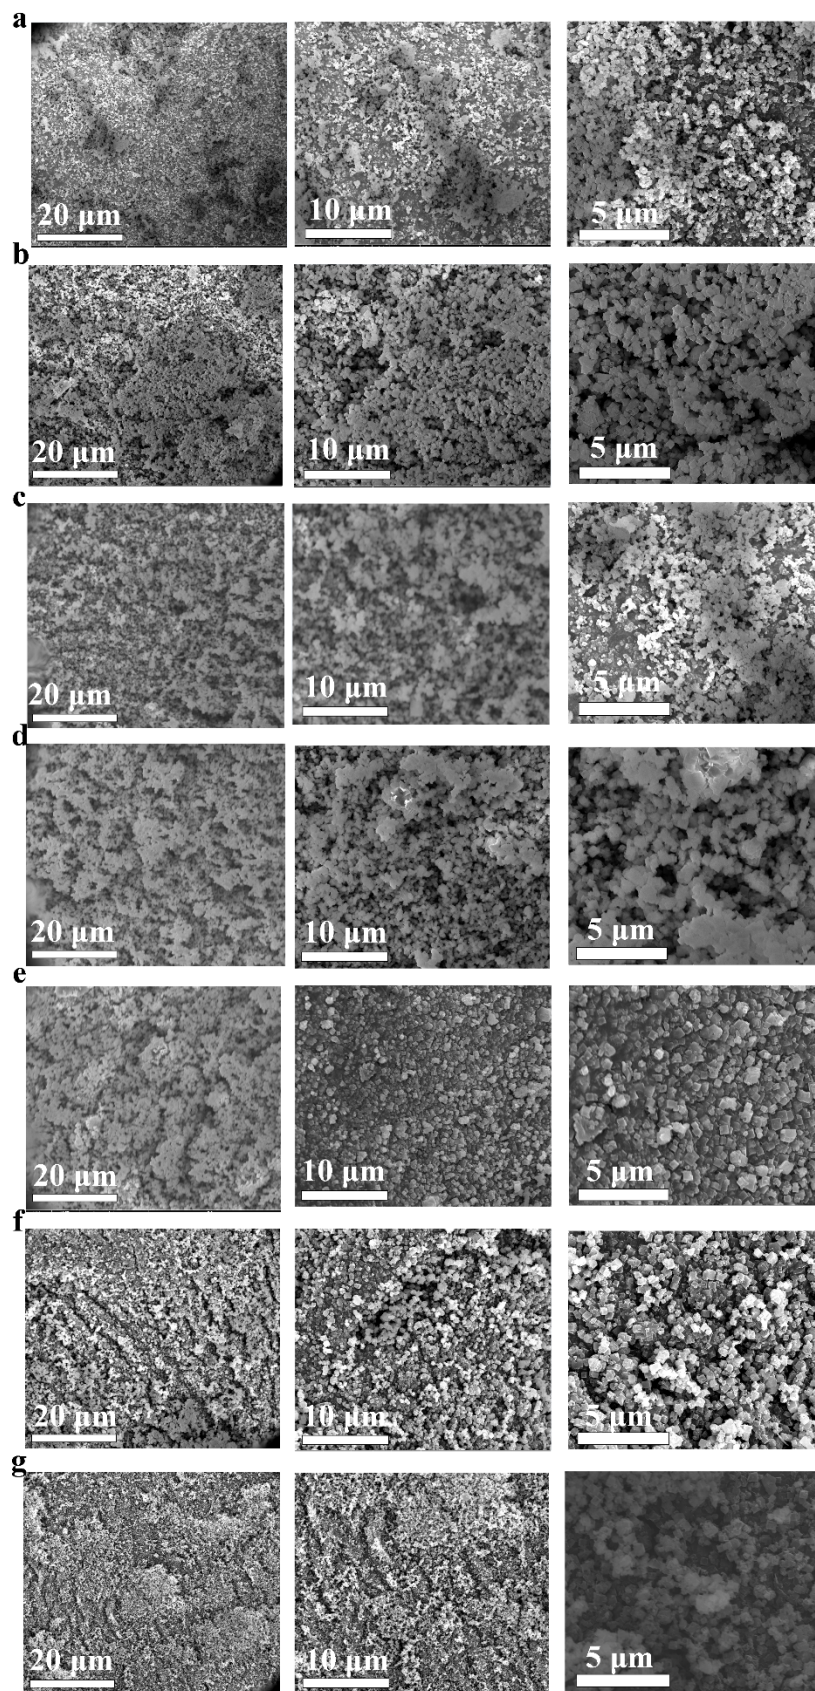

**Figure S3.** SEM images of (a) Sample-CF, (b) Sample-FF-1, (c) Sample-FF-2, (d) Sample-FF-3, (e) Sample-FF-4, (f) Sample-FF-5 and (g) Sample-FF.

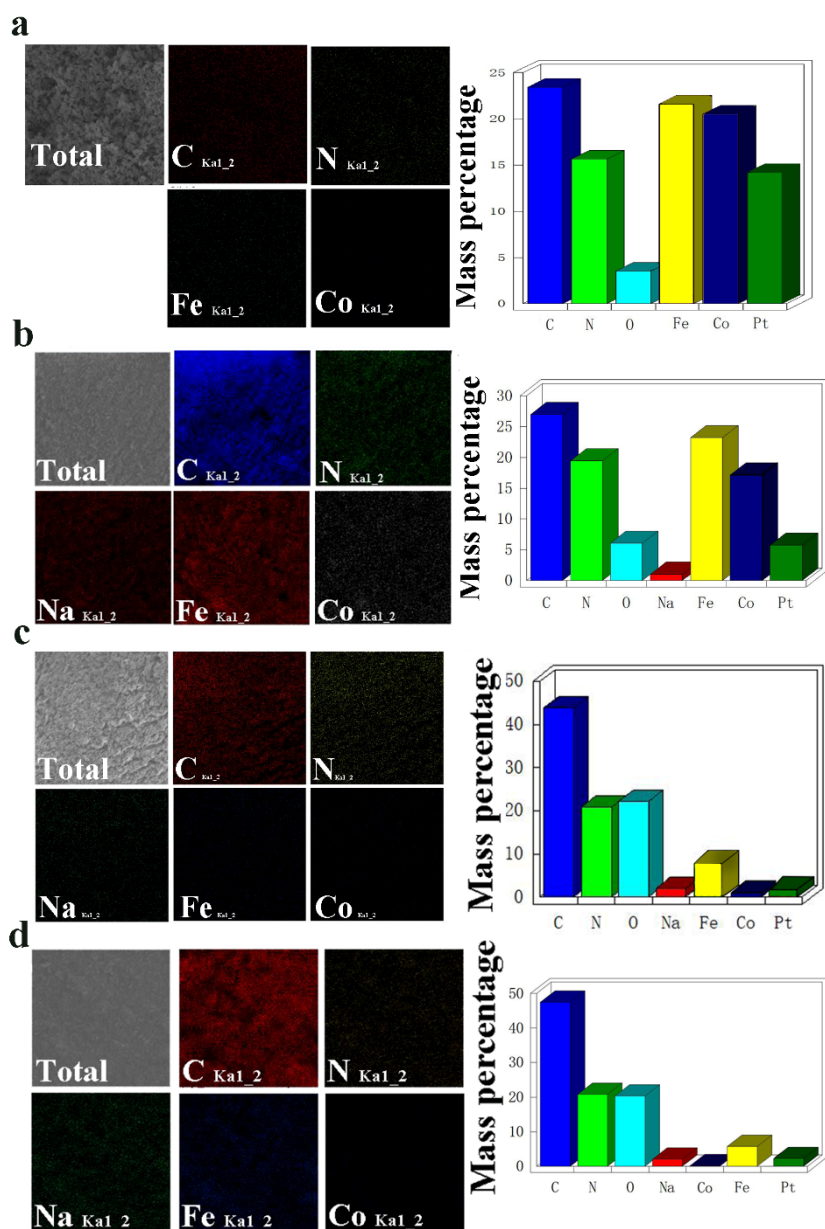

**Figure S4.** EDS analysis and the element mapping images of (a) Sample-CF, (b) Sample-FF-1, (c) Sample-FF-4 and (d) Sample-FF.



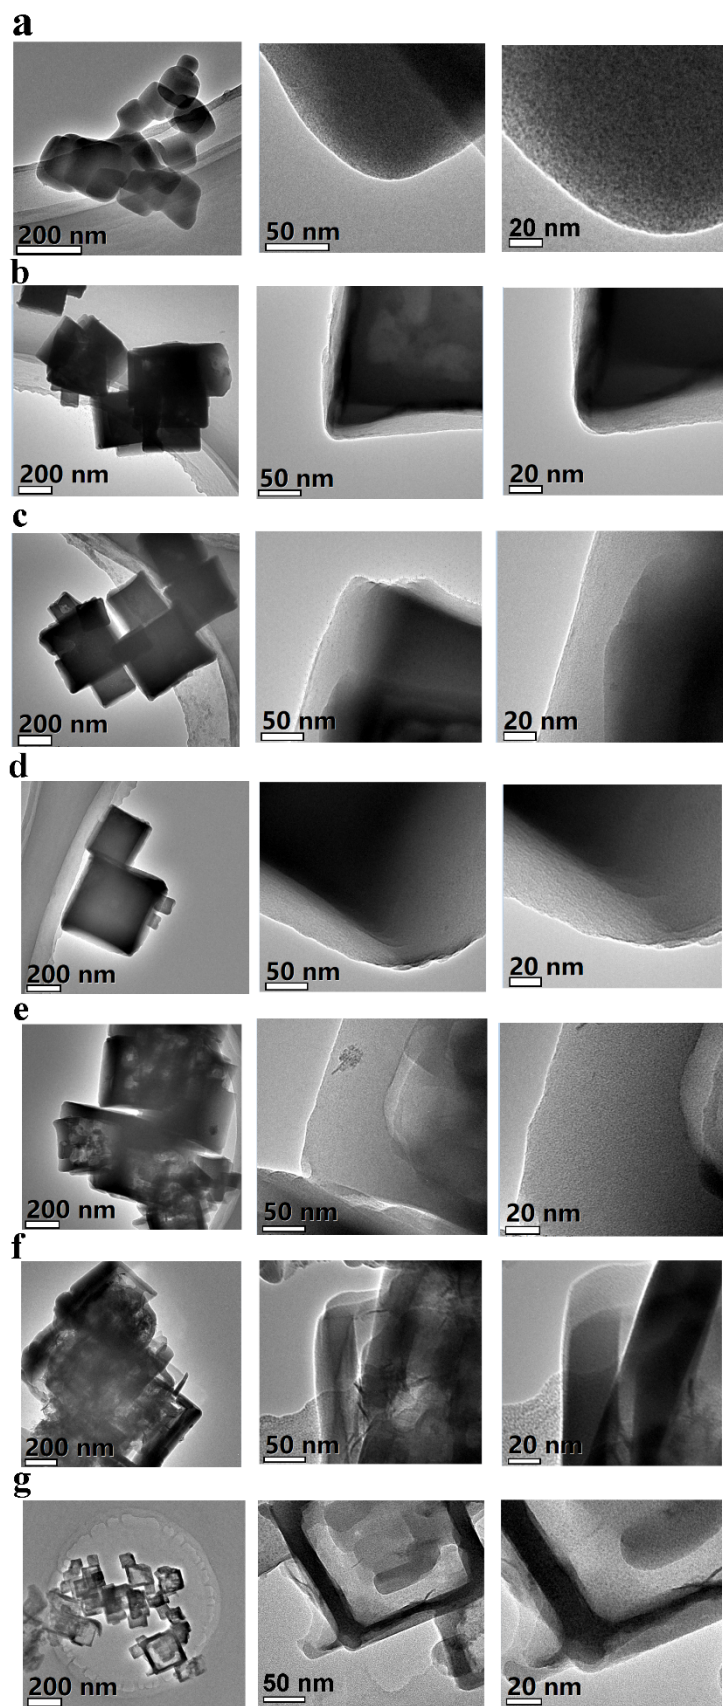

**Figure S5.** TEM images of (a) Sample-CF, (b) Sample-FF-1, (c) Sample-FF-2, (d) Sample-FF-3, (e) Sample-FF-4, (f) Sample-FF-5 and (g) Sample-FF.

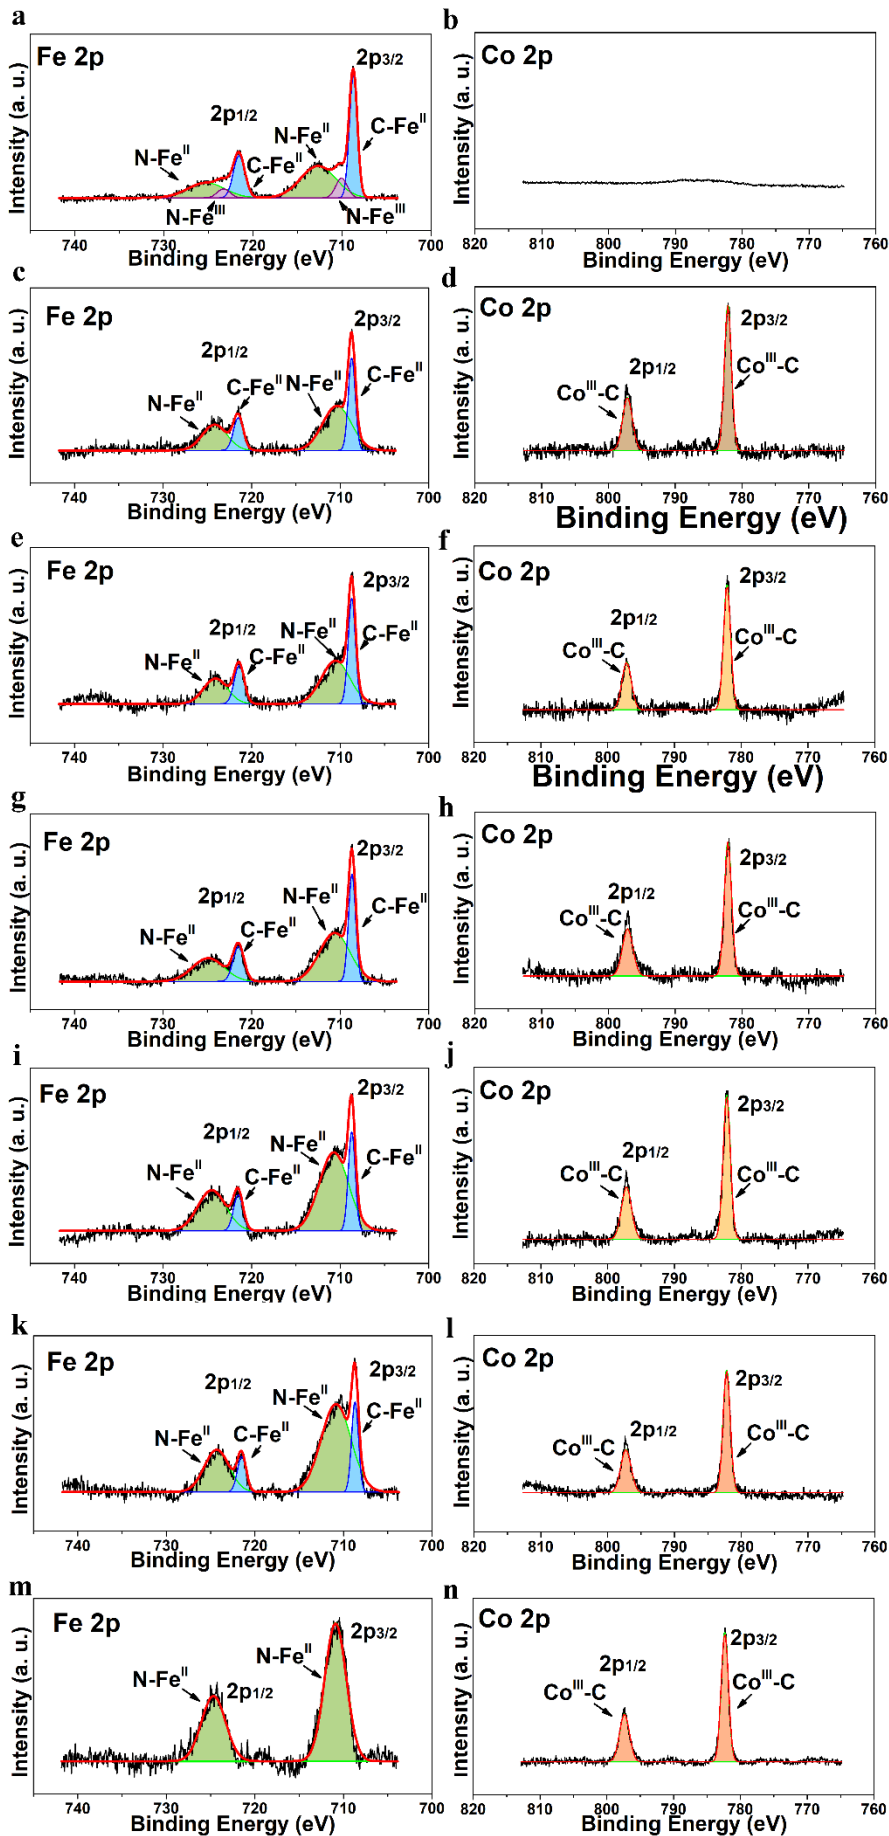

**Figure S6.** Ex situ XPS results of (a, b) Sample-CF, (c, d) Sample-FF-1, (e, f) Sample-FF-2, (g, h) Sample-FF-3, (i, j) Sample-FF-4, (k, l) Sample-FF-5 and (m, n) Sample-FF.

| <b>a</b>         |         |            |      |                  |           |                |           |
|------------------|---------|------------|------|------------------|-----------|----------------|-----------|
| Quantify By      |         | Components |      |                  |           |                |           |
| <b>Sample-CF</b> |         |            |      |                  |           |                |           |
| Component        | BE [eV] | FWHM [eV]  | RSF  | Atomic conc. [%] | Error [%] | Mass conc. [%] | Error [%] |
| Fe 2p            | 710.46  | 0.00       | 2.96 | 2.7              | 0.38      | 10.1           | 1.30      |
| Co 2p            | 782.31  | 0.00       | 3.59 | 3.3              | 0.51      | 13.0           | 1.78      |
| N 1s             | 398.71  | 0.00       | 0.48 | 17.5             | 0.45      | 16.2           | 0.55      |
| C 1s             | 284.96  | 0.00       | 0.28 | 76.4             | 0.68      | 60.6           | 1.58      |

  

| <b>b</b>         |         |            |      |                  |           |                |           |
|------------------|---------|------------|------|------------------|-----------|----------------|-----------|
| Quantify By      |         | Components |      |                  |           |                |           |
| <b>Sample-FF</b> |         |            |      |                  |           |                |           |
| Component        | BE [eV] | FWHM [eV]  | RSF  | Atomic conc. [%] | Error [%] | Mass conc. [%] | Error [%] |
| Co 2p            | 803.17  | 0.00       | 3.59 | 0.0              | 0.06      | 0.1            | 0.22      |
| N 1s             | 397.97  | 0.00       | 0.48 | 22.4             | 0.55      | 21.1           | 0.67      |
| C 1s             | 285.02  | 0.00       | 0.28 | 72.2             | 0.68      | 58.5           | 1.34      |
| Fe 2p            | 708.77  | 0.00       | 2.96 | 5.4              | 0.54      | 20.3           | 1.70      |

  

| <b>c</b>         |         |            |      |                  |           |                |           |
|------------------|---------|------------|------|------------------|-----------|----------------|-----------|
| Quantify By      |         | Components |      |                  |           |                |           |
| <b>Sample-PB</b> |         |            |      |                  |           |                |           |
| Component        | BE [eV] | FWHM [eV]  | RSF  | Atomic conc. [%] | Error [%] | Mass conc. [%] | Error [%] |
| Fe 2p            | 708.70  | 0.00       | 2.96 | 7.2              | 0.61      | 25.9           | 1.75      |
| Co 2p            | 805.40  | 0.00       | 3.59 | 0.0              | 0.07      | 0.1            | 0.25      |
| N 1s             | 397.95  | 0.00       | 0.48 | 21.8             | 0.66      | 19.5           | 0.73      |
| C 1s             | 285.00  | 0.00       | 0.28 | 70.9             | 0.80      | 54.4           | 1.40      |

**Figure S7.** XPS element mass content test: (a) Sample-CF. (b) Sample-FF. (c) Sample-PB.

**Table S1.** ICP result

| Sample ID | Sample-FF |       | Sample-PB |      |
|-----------|-----------|-------|-----------|------|
|           | Na        | Fe    | Na        | Fe   |
| Mean      | 1.587     | 5.166 | 0.547     | 2.2  |
| Units     | mg/L      | mg/L  | mg/L      | mg/L |

EA result

| Sample ID    | Sample-FF |        | Sample-PB |        |
|--------------|-----------|--------|-----------|--------|
|              | C         | N      | C         | N      |
| Weight ratio | 20.535    | 23.958 | 17.744    | 20.701 |

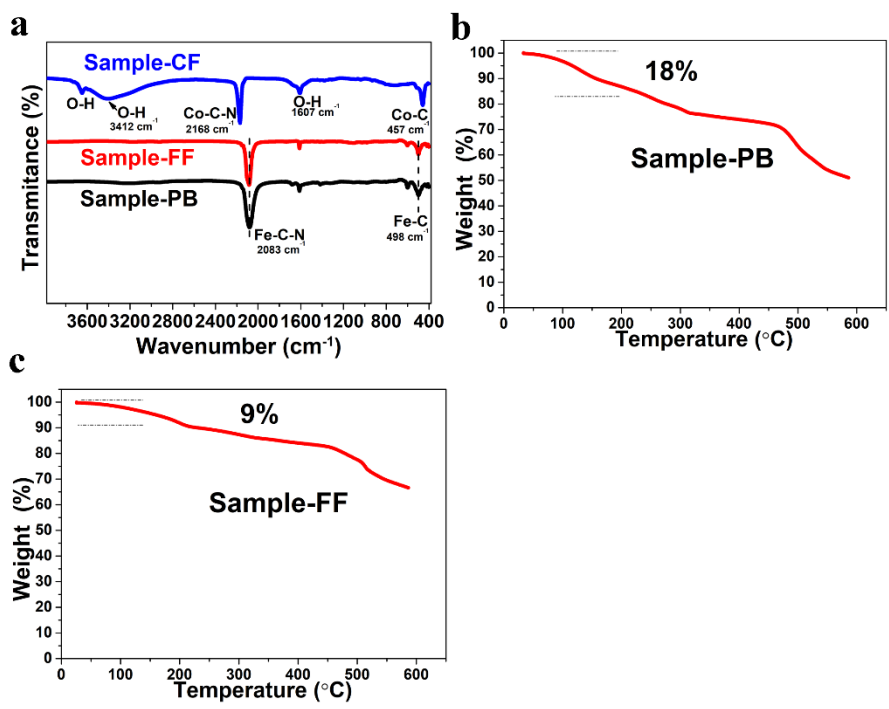

Figure S8. TG curves of (a) Sample-FF and (b) Sample-PB.

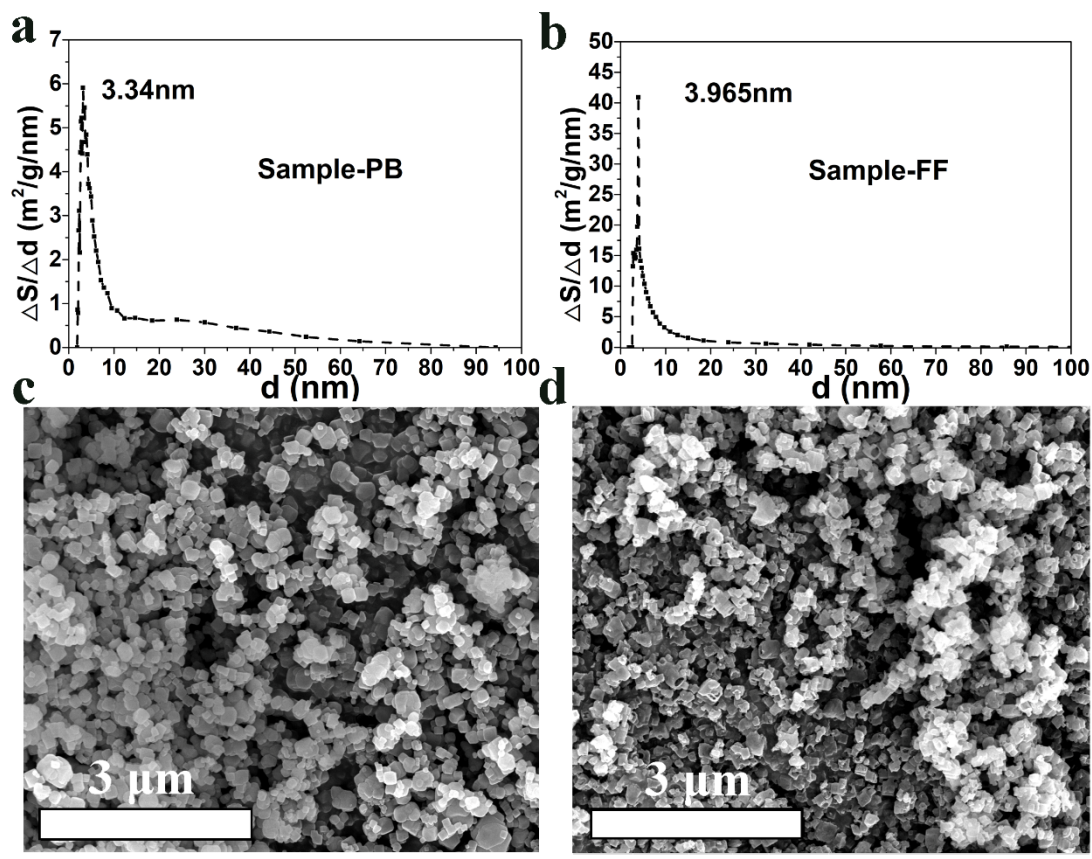

Figure S9. (a) The BJH pore-size distribution plot the Sample-PB. (b) The BJH pore-size distribution plot the Sample-FF. (c) The HR-FESEM image of the Sample-PB. (d) The HR-



FESEM image of the Sample-FF.

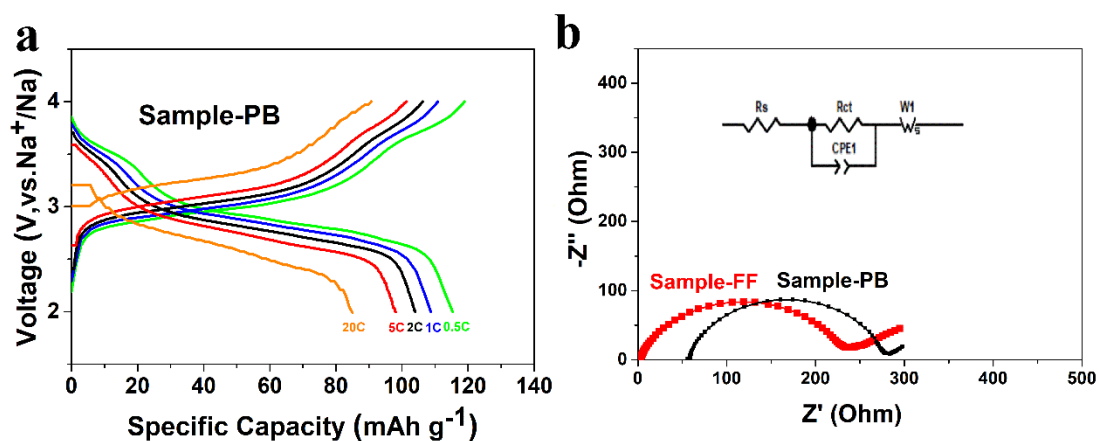

**Figure S10.** (a) charge/discharge curves of the Sample-PB at various current densities. (b) EIS plot and fitted result of both the samples.

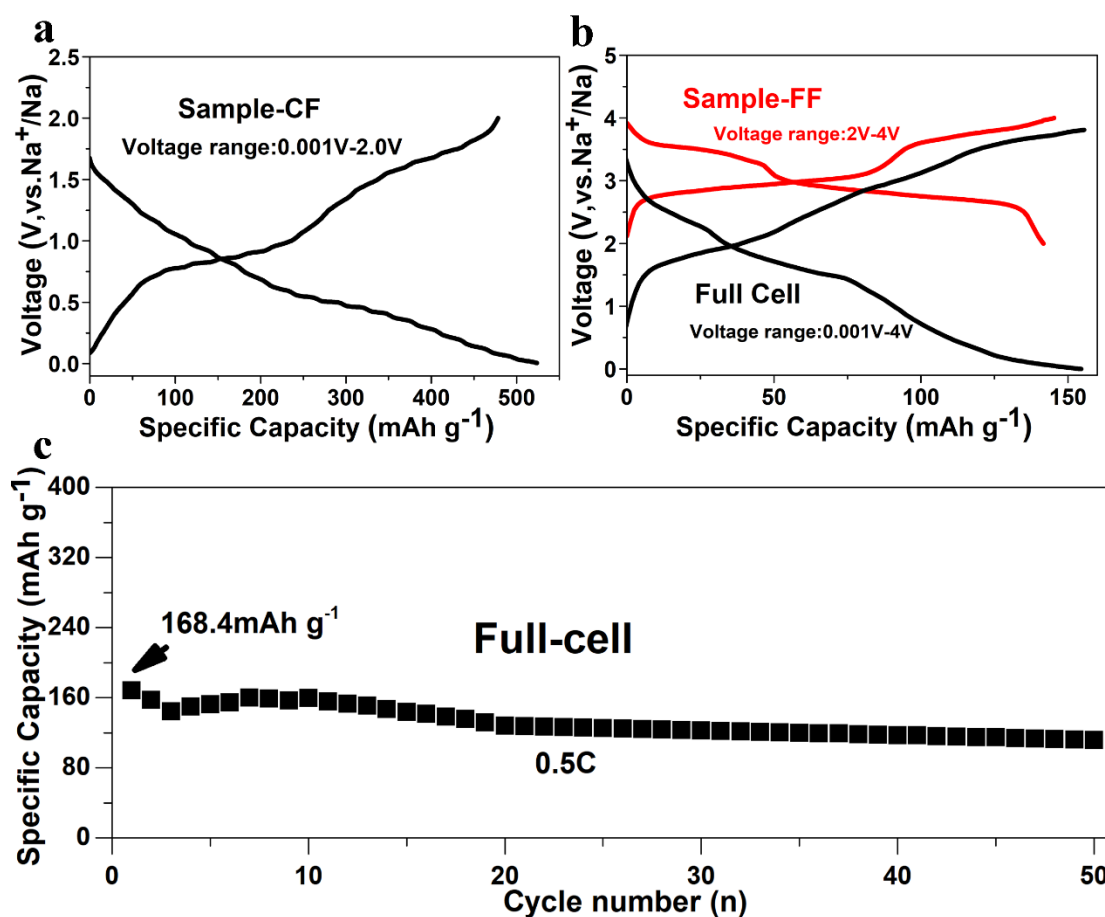

**Figure S11.** (a) Electrochemical charge and discharge plots of the Sample-CF at a current density of 100 mA g<sup>-1</sup>. (b) The Sample-FF/the Sample-CF full-cell charge and discharge plots at a current density of 0.5C, 1 C=170 mA g<sup>-1</sup>. (c) Full-cell electrochemical cycling performance at a current density of 0.5C, 1 C=170 mA g<sup>-1</sup>.

| title                                                                                                                                               | Precursors     | additive name                                                | Need additive | Structures                 | Applications    | Specific capacity         | Year |
|-----------------------------------------------------------------------------------------------------------------------------------------------------|----------------|--------------------------------------------------------------|---------------|----------------------------|-----------------|---------------------------|------|
| Frontispiece: Synthesis of Monocrystalline Nanoframes of Prussian Blue Analogues by Controlled Preferential Etching                                 | Ni-Fe cube     | HCl                                                          | YES           | Ni-Fe yolk@frame structure | Na+/Li+ storage | less than 100 mAh/g at 1C | 2016 |
| Potassium ions stabilized hollow Mn-based prussian blue analogue nanocubes as cathode for high performance sodium ions battery                      | Mn-Fe cube     | sodium citrate assisted                                      | YES           | Mn-Fe Box                  | Na+ storage     | 128 mAh/g at 50mA/g       | 2020 |
| Hierarchical sodium-rich Prussian blue hollow nanospheres as high-performance cathode for sodium-ion batteries                                      | Fe-Fe cube     | ascorbic acid, and NaCl                                      | YES           | hollow sphere              | Na+ storage     | 142 mAh/g at 0.1C         | 2018 |
| Metal-organic-framework-derived hollow polyhedrons of prussian                                                                                      | Co-Fe cube     | cetyltrimethylammonium bromide                               | YES           | CoHCF hollow dodecahedrons | Na+ storage     | 32.7–50 Wh/kg             | 2019 |
| Hierarchical Hollow Prussian Blue Rods Synthesized via Self-Sacrifice Template as Cathode for High Performance Sodium Ion Battery                   | MnO2 nanosheet | tetramethylammonium hydroxide                                | YES           | hollow rod-like structure  | Na+ storage     | 117.3 mAh/g at 1C         | 2018 |
| A Chemical Precipitation Method Preparing Hollow-Core-Shell Heterostructures Based on the Prussian Blue Analogs as Cathode for Sodium-Ion Batteries | PBA cube       | 3.0 g of PVP (K30, MW ≈ 40 000) and 4.38 g of sodium citrate | YES           | hollow structure           | Na+ storage     | 123 mA h/g at 1C          | 2018 |
| This work                                                                                                                                           | Fe-Co cube     | NO                                                           | NO            | hollow cube                | Na+ storage     | 133.6mAh/g at 1C          |      |

**Figure S12.** Comparison of other reported work and this work.

### The calculation process of the exact formula:

The Sample-FF:

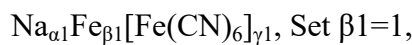

The formula changes into  $\text{Na}_{x_1}\text{Fe}_1[\text{Fe}(\text{CN})_6]_{y_1}$

1.  $x_1:(y_1+1) = (1.587/23) : (5.166/56)$  -----atom ratio
2.  $x_1+2=4y_1$  -----electron balance

Result:  $x_1=1.38, y_1=0.845$ .

Water content:

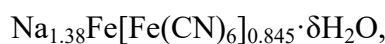

$$18\delta : (157.03 + 18\delta) = 9 : 100 \quad \text{-----weight ratio}$$

Result:  $\delta=0.86$

The Sample-PB:

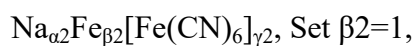

The formula changes into  $\text{Na}_{x_2}\text{Fe}_1[\text{Fe}(\text{CN})_6]_{y_2}$

3.  $x_2:(y_2+1) = (0.547/23) : (2.2/56)$  -----atom ratio
4.  $x_2+2=4y_2$  -----electron balance

Result:  $x_2=1.07, y_2=0.768$ .

Water content:

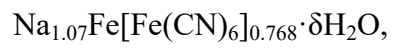

$$18\delta:(143.51+18\delta)=18:100$$

-----weight ratio

Result:  $\delta=1.75$
